# Supplementary material for: Transcriptomics combined with physiological analysis provides insights into the mechanism of resistance to Coleosporium bletiae in Bletilla striata
Source: Frontiers journal article supplement (doi:10.3389/fpls.2025.1604512), 2025-07-14
Supplement: Data_Sheet_1.pdf [file Data_Sheet_1.pdf]

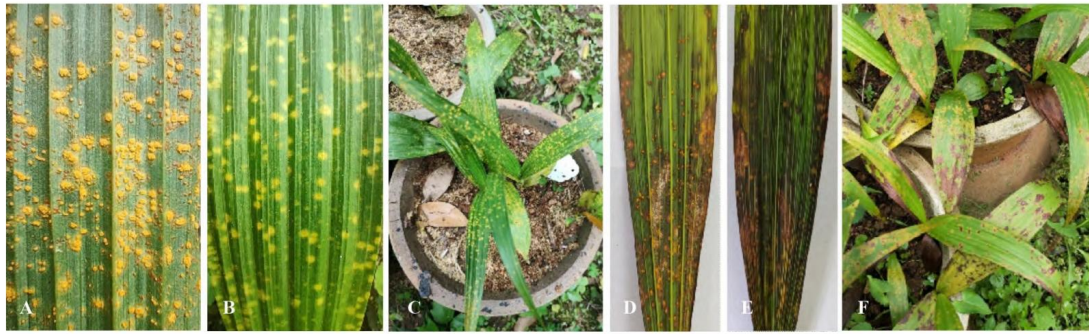

Figure S1 Symptoms of rust on *B. striata*; A, B. leaves infected with urediospore (A. back; B. front); C. plants infected with urediospore; D, E. leaves infected with teleutospore (D. back; E. front); F. plants infected with teleutospore.

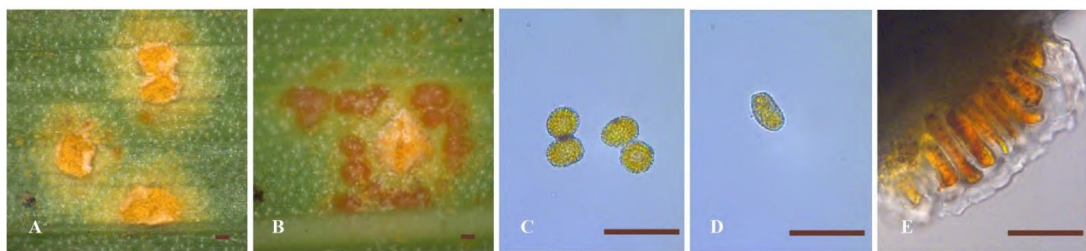

Figure S2 Morphological characteristics of rust pathogen; A,B. uredinium; C,D. urediospore; E. teleutospore; scale bar: A,B=0.1mm; C-E=50um.

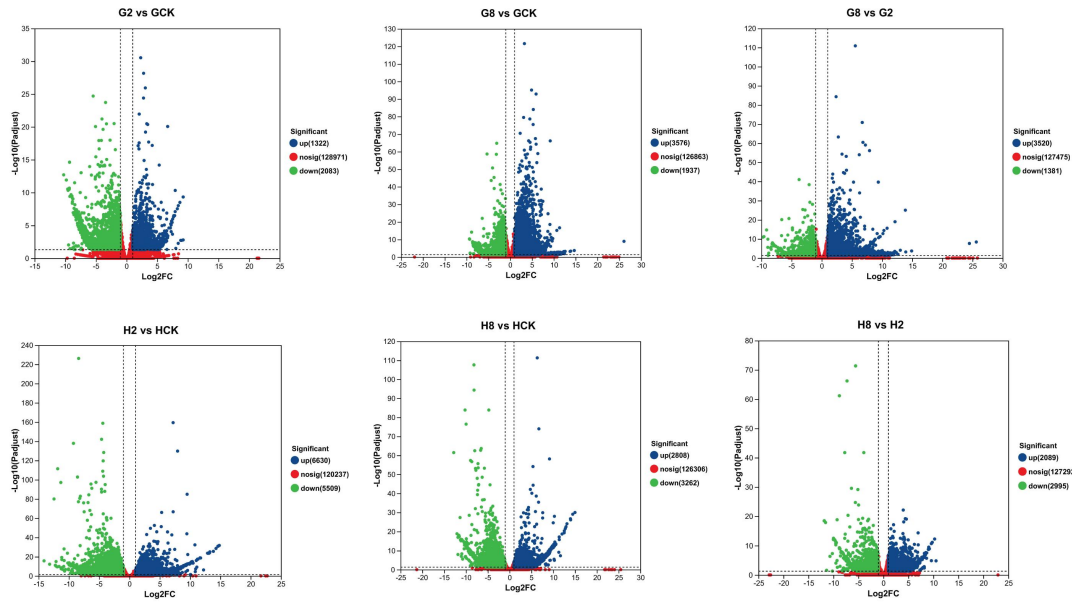

Figure S2. Number of differentially expressed genes (DEGs) between different groups. GCK, G2 and G8 represent samples on 0, 2 and 8 dpi in susceptible material; HCK, H2 and H8 represent samples on 0, 2 and 8 dpi in resistant material.

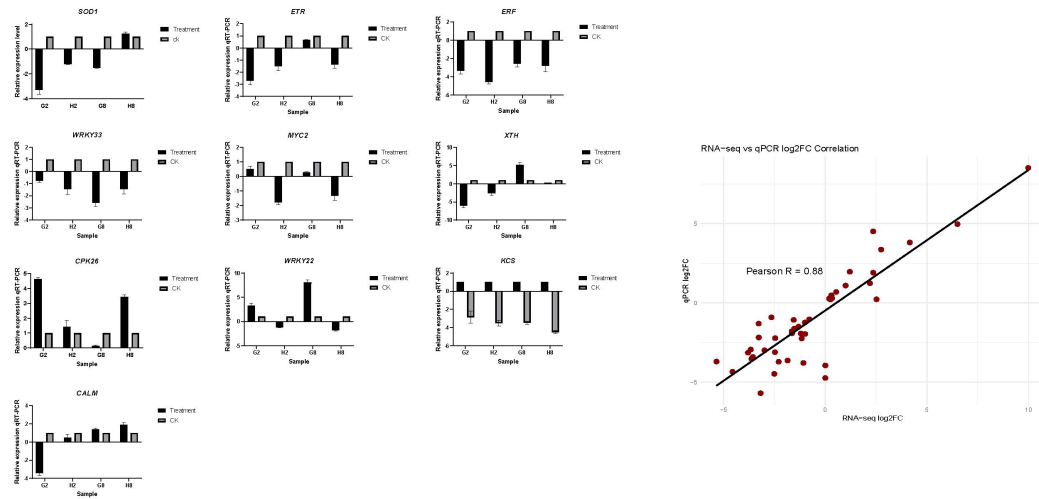

Figure S3. Validation of RNA-seq results by qPCR; a, qPCR results of 10 candidate genes; b, correlation of  $\log_2$ fold-changes for 10 candidate genes between RNA-seq (TPM normalized) and qPCR. The strong positive correlation ( $r = 0.88$ ,  $p < 0.01$ ) confirms the reliability of transcriptome data.
