# Supplementary material for: Transcriptomics combined with physiological analysis provides insights into the mechanism of resistance to Coleosporium bletiae in Bletilla striata
Source: Frontiers journal article supplement (doi:10.3389/fpls.2025.1604512), 2025-07-14
Supplement: Table_1.xls [file Table_1.xls]

## Sheet: Supplementary Table S1
Table S1 Standard curve production method
Tube number	0	1	2	3	4	5
Volume of standard protein solution /mL	0	0.2	0.4	0.6	0.8	1
Volume of distilled water /mL	1	0.8	0.6	0.4	0.2	0
protein content/μg	0	20	40	60	80	100

## Sheet: Supplementary Table S2
Table S2 Primer sequences used in Real-time PCR
gene name	primer sequence
SOD1 (DN49610)	GCTGGACCACATTTCAACCC
	GTCCTTCCGAGAACAGAGTGC
ETR(DN531)	ATGAGTCAGGGAATGAGAAG
	TGGAGTATGGCATGAAAGAT
ERF(DN16282)	CGAGATTAGGGACTCAACGC
	TCCTCCAACTCCACCACATT
WRKY33(DN4172)	ATGAGGGCAAGCACAACCAC
	AGCGTCCATTAGATGACTGAAA
MYC2(DN2177)	GCCTGGACATACGCCATCTT
	CGTGTCGGTTACCTCCTCGTC
XTH(DN1676)	GTCACCGCCTACTACCTATCCT
	TCGTAATTCATCCACCCTCC
CPK26(DN7604)	TTCCTTTCCTCAGCCGTTGC
	ACCGACCTCATCAGACTCATCCTC
WRKY22 (DN9292)	ACATACAGCGGCGAGCACAA
	TCGGCGACAGACGAACACCT
KCS(DN4740)	AGACGACCAACGCATCAAAGG
	GAAGATGAGTTGTTCGGAGAAGG
CALM(DN37386)	TCTTCCCGTTCTTCTAAAGC
	AACAAACCCATCACCATTCT
Actin	AATCCCAAGGCAAACAGA
	CACCATCACCAGAATCCAG
GAPDH	GCTAAAGACGCTGTCACTGAG
	GAGACCAGAAACTTACCCTCG

## Sheet: Supplementary Table S3
Table S3 Statistics of Bletilla striata transcriptome sequencing data
Sample	Raw reads	Clean reads	Clean bases	Error rate(%)	Q20(%)	Q30(%)	GC content(%)
GCK1	54140668	53643990	7.63G	0.0257	97.08	94.96	46.92
GCK2	44176400	43705708	6.50G	0.0268	96.61	94.05	45.96
GCK3	46610272	46121442	6.81G	0.0262	96.89	94.55	45.88
G21	47190442	46725322	6.92G	0.026	96.95	94.66	45.55
G22	52812696	52263460	7.75G	0.0262	96.87	94.52	45.51
G23	44828716	44345266	6.56G	0.0263	96.86	94.49	45.78
G81	50709776	50225050	7.40G	0.026	96.97	94.71	46.31
G82	47463384	47019580	6.94G	0.026	96.95	94.66	46.22
G83	45624714	45154840	6.65G	0.026	96.95	94.68	46.39
HCK1	44487676	44069458	6.49G	0.0264	96.74	94.41	45.76
HCK2	44998506	44509908	6.55G	0.0267	96.64	94.22	46.11
HCK3	42631104	42144692	6.16G	0.0265	96.73	94.35	46.33
H21	42645106	42231060	6.22G	0.0264	96.75	94.38	45.76
H22	42546210	42044430	6.21G	0.0268	96.6	94.09	46.26
H23	46071048	45555080	6.73G	0.0269	96.54	94.03	45.93
H81	45295860	44745700	6.58G	0.0266	96.69	94.26	46.42
H82	45836520	45297928	6.71G	0.0271	96.43	93.85	46.18
H83	46731964	46190374	6.83G	0.0271	96.45	93.87	46.13

## Sheet: Supplementary Table S4
Table S4 Comparison statistics with assembly results
Sample	Clean reads	Mapped reads	Mapped ratio
GCK1	26821995	21705197	0.8092
GCK2	21852854	16614490	0.7603
GCK3	23060721	17661895	0.7659
G21	23362661	18538049	0.7935
G22	26131730	20172540	0.772
G23	22172633	17203955	0.7759
G81	25112525	19991784	0.7961
G82	23509790	18485198	0.7863
G83	22577420	18200771	0.8061
HCK1	22034729	17073470	0.7748
HCK2	22254954	17242648	0.7748
HCK3	21072346	16438439	0.7801
H21	21115530	16379737	0.7757
H22	21022215	16162864	0.7688
H23	22777540	17614450	0.7733
H81	22372850	17524300	0.7833
H82	22648964	17641828	0.7789
H83	23095187	18116476	0.7844
